# Supplementary material
Source: publisher figshare collection journal article supplement (https://gsajournals.figshare.com/articles/dataset/_/7590779)
Supplement: Supplementary file 1 [file 1]

# Genetically distinct behavioral modules underlie natural variation in thermal performance curves

Gregory W. Stegeman, Scott E. Baird, William S. Ryu, Asher D. Cutter

Supplementary Tables S1, S3, S4, S5, S6 (filenames listed for S2 and S7)

Supplementary Figures S1-S12

## Supplementary Tables

**Supplementary Table S1. *C. briggsae* wild isolate strain origin and background.**

| Strain name | Phylogeographic group**** | Geographic origin |
|-------------|---------------------------|-------------------|
| AF16*       | Tropical                  | India             |
| ED3083      | Tropical                  | South Africa      |
| VT847**     | Tropical                  | Hawaii, USA       |
| NIC65***    | Tropical                  | French Guiana     |
| JU1338***   | Tropical                  | India             |
| GXW0023***  | Tropical                  | China             |
| NIC21       | Tropical                  | Taiwan            |
| JU1908***   | Tropical                  | Australia         |
| HK104**     | Temperate                 | Japan             |
| EG4181***   | Temperate                 | Utah, USA         |
| JU439       | Temperate                 | Iceland           |
| QX1547***   | Temperate                 | Tennessee, USA    |
| NIC6        | Temperate                 | Switzerland       |
| PB826       | Temperate                 | Ohio, USA         |
| QR24***     | Montreal                  | Quebec, Canada    |
| QR25***     | Montreal                  | Quebec, Canada    |
| JU1341***   | Kerala                    | India             |
| JU1345      | Kerala                    | India             |
| JU1348***   | Kerala                    | India             |
| ED3092      | Nairobi                   | Kenya             |
| ED3098      | Nairobi                   | Kenya             |
| ED3101***   | Nairobi                   | Kenya             |
| VX0034***   | Hubei                     | China             |
| NIC20***    | Taiwan                    | Taiwan            |

\*genome data in (STEIN *et al.* 2003); \*\* genome data in (HILLIER *et al.* 2007); \*\*\* genome data in (THOMAS *et al.* 2015); \*\*\*\* population structure designations in (FELIX *et al.* 2013)

**Supplementary Table S2. RIL strains and genotypes.**

SuppTable\_S2\_CbrQTL\_gen\_h2na.csv

**Supplementary Table S3. NIL markers.**

|                           |                            |                            |                             |                            |
|---------------------------|----------------------------|----------------------------|-----------------------------|----------------------------|
| <b>position</b>           | 6230047                    | 6741889                    | 14167323                    | 14794163                   |
| <b>enzyme</b>             | DraI                       | DraI                       | DraI                        | DraI                       |
| <b>Tm (forward)</b>       | 55                         | 54.36                      | 55.15                       | 55.29                      |
| <b>Sequence (forward)</b> | TGTACCTGAAT<br>TTTCATTGGTA | GAAAATTATGA<br>ACTTCCGATT  | AAAGTGTGATA<br>CGGGAAATAAG  | CTTCCTCTTCT<br>GTTGTGAAAAT |
| <b>Tm (reverse)</b>       | 55                         | 55.11                      | 54.57                       | 55.99                      |
| <b>Sequence (reverse)</b> | AACCTTAGTTT<br>CCGAACCATC  | AAAACATTGGT<br>ATGTGTGTCAG | TTTGAAGTTAGC<br>TTTGAGAATTT | CTATCCTGCCA<br>AGAAGATGAT  |
| <b>Size</b>               | 742                        | 740                        | 753                         | 730                        |
| <b>AF16 fragments</b>     | 344, 377                   | 428, 291                   | 732                         | 473, 236                   |
| <b>HK104 fragments</b>    | 721                        | 719                        | 341, 391                    | 709                        |

**Supplementary Table S4. Parameter estimates from three parameter logistic function fit to Locomotion index (LI1) values from pooled wild isolate strains of *C. briggsae*.**

|                   | <b>Rearing temperature</b> | <b>Asymptote (<math>\alpha</math>)* (LI1)</b> | <b>Slope (<math>\beta</math>)*</b> | <b>Inflection point (<math>\tau</math>)* (°C)</b> |
|-------------------|----------------------------|-----------------------------------------------|------------------------------------|---------------------------------------------------|
| <b>Lower TPC</b>  | 16°C                       | 0.344 ± 0.002                                 | 0.461 ± 0.008                      | 15.628 ± 0.046                                    |
|                   | 23°C                       | 0.414 ± 0.002                                 | 0.659 ± 0.011                      | 17.623 ± 0.030                                    |
|                   | 28°C                       | 0.375 ± 0.002                                 | 0.787 ± 0.015                      | 18.885 ± 0.030                                    |
| <b>Higher TPC</b> | 16°C                       | 0.345 ± 0.003                                 | -0.854 ± 0.025                     | 30.866 ± 0.043                                    |
|                   | 23°C                       | 0.402 ± 0.002                                 | -0.788 ± 0.018                     | 32.860 ± 0.036                                    |
|                   | 28°C                       | 0.376 ± 0.002                                 | -0.683 ± 0.016                     | 33.086 ± 0.044                                    |

\*Parameter estimates ± 1 standard error

**Supplementary Table S5. Position, significance and heritability of QTL peaks from multiple imputation QTL analysis of ‘synthetic’ principal component traits, function-valued traits, and univariate locomotion index (LI7 at 35.6°C).**

| Phenotype full name         | Chromosome | map position (cM)* | nucleotide position (Mbp)** | Bayes interval L-R marker position (Mbp) | H <sup>2***</sup> | LOD   | P****   |
|-----------------------------|------------|--------------------|-----------------------------|------------------------------------------|-------------------|-------|---------|
| Principal Component 5       | 1          | 82.50              | 13.75                       | 13.06-14.72                              | 0.082             | 2.83  | 0.0332  |
| Principal Component 1       | 2          | 34.58              | 6.5                         | 5.36-11.12                               | 0.128             | 4.54  | 0.0012  |
| Asymptote ( $\alpha$ )      | 2          | 39.55              | 9.91                        | 6.33-11.00                               | 0.192             | 7.09  | <0.0001 |
| Principal Component 6       | 2          | 42.59              | 11.18                       | 0.64-12.47                               | 0.115             | 4.05  | 0.002   |
| Principal Component 3       | 3          | 37.61              | 4.09                        | 1.11-14.58                               | 0.082             | 2.83  | 0.0452  |
| Asymptote ( $\alpha$ )      | 4          | 0.30               | 0.55                        | 0.09-2.42                                | 0.085             | 2.95  | 0.0332  |
| Principal Component 3       | 5          | 30.50              | 7.69                        | 3.45-11.62                               | 0.117             | 4.13  | 0.0036  |
| Inflection point ( $\tau$ ) | 5          | 32.15              | 8.08                        | 5.88-12.66                               | 0.146             | 5.23  | <0.0001 |
| Locomotion (LI7) at 35.6°C  | 5          | 37.35              | 11.56                       | 6.19-13.01                               | 0.276             | 10.74 | <0.0001 |
| Principal Component 2       | 5          | 37.66              | 11.62                       | 6.75-14.30                               | 0.147             | 5.27  | <0.0001 |
| Slope ( $\beta$ )           | 5          | 37.66              | 11.62                       | 5.34-13.90                               | 0.203             | 7.52  | <0.0001 |
| Principal Component 3       | X          | 44.36              | 19.29                       | 16.52-20.38                              | 0.148             | 5.3   | 0.0004  |
| Principal Component 4       |            |                    | no significant QTL          |                                          |                   |       |         |
| Principal Component 7       |            |                    | no significant QTL          |                                          |                   |       |         |
| Principal Component 8       |            |                    | no significant QTL          |                                          |                   |       |         |

\* location of the LOD peak on the expanded genetic map of the RILs.

\*\* location of the nearest genotyped marker to the LOD peak.

\*\*\* QTL heritability estimated as  $1 - 10^{-2 \text{ LOD} / n}$  ( $n$  = number of RILs).

\*\*\*\* P-value reflects the 5% significance for LOD threshold from 2500 permutations of the data for each phenotype individually (not corrected for multiple hypotheses with Bonferroni correction  $0.05/12 = 0.0042$ ).

**Supplementary Table S6. Additive and epistatic interaction effects from two-dimensional QTL models.**

| Phenotype                   | Locus 1*   | Locus 2*  | Model**     | lod.fv1     | p-value      | lod.av1     | p-value      | lod.int      | p-value       |
|-----------------------------|------------|-----------|-------------|-------------|--------------|-------------|--------------|--------------|---------------|
| Asymptote ( $\alpha$ )      | II:39.5    | III:60    | Additive    | 3.49        | 0.31         | <b>3.47</b> | <b>0.008</b> | 0.025        | 1             |
| Asymptote ( $\alpha$ )      | II:39.5    | IV:0.5    | Additive    | 3           | 0.609        | <b>3</b>    | <b>0.022</b> | 0.006        | 1             |
| PC1                         | II:39.5    | III:0     | Additive    | 3.55        | 0.254        | <b>3.45</b> | <b>0.007</b> | 0.104        | 1             |
| PC1                         | II:34.5    | V:77.5    | Additive    | 3.63        | 0.223        | <b>3.57</b> | <b>0.005</b> | 0.057        | 1             |
| PC2                         | II:22.5*** | V:38      | Additive    | <b>4.5</b>  | <b>0.037</b> | <b>4.16</b> | <b>0</b>     | 0.338        | 1             |
| PC3                         | III:37.5   | V:23.5*** | Additive    | <b>6.18</b> | <b>0.001</b> | <b>3.65</b> | <b>0.005</b> | 2.528        | 0.4256        |
| PC3                         | IV:46.5    | V:31.5    | Additive    | 3.04        | 0.546        | <b>2.99</b> | <b>0.019</b> | 0.051        | 1             |
| PC3                         | V:28.5     | X:44.5*** | Additive    | <b>4.89</b> | <b>0.018</b> | <b>4</b>    | <b>0.002</b> | 0.889        | 0.9998        |
| PC5                         | III:37***  | IV:48***  | Interaction | <b>5.73</b> | <b>0.027</b> | 1.33        | 0.847        | <b>4.396</b> | <b>0.0302</b> |
| Slope ( $\beta$ )           |            |           | NA          |             |              |             |              |              |               |
| Inflection point ( $\tau$ ) |            |           | NA          |             |              |             |              |              |               |
| PC4                         |            |           | NA          |             |              |             |              |              |               |
| PC6                         |            |           | NA          |             |              |             |              |              |               |
| LI7 at 35.6°C               |            |           | NA          |             |              |             |              |              |               |

\* Chromosome map position (cM) on the expanded RIL genetic map.

\*\* Interaction model type determined from a significant full model (2-dimensional QTL scan in r/qtl) allowing for interactions (lod.fv1) when additive model (lod.av1) was not; additive model type obtained from significant lod.av1 and non-significant lod.fv1, or by a non-significant interaction between them (lod.int); significant model statistics shown in bold.

\*\*\* Change in position by >5cM between models for lod.fv1 and lod.av1.

**Supplementary Table S7. Genes with coding differences between Tropical and Temperate clade *C. briggsae* strains (from Thomas et al. 2015) in the Chromosome V QTL region.**

SuppTable\_S7 - Subset of genes with nonsynonymous changes and GO terms.xlsx

## Supplementary figures

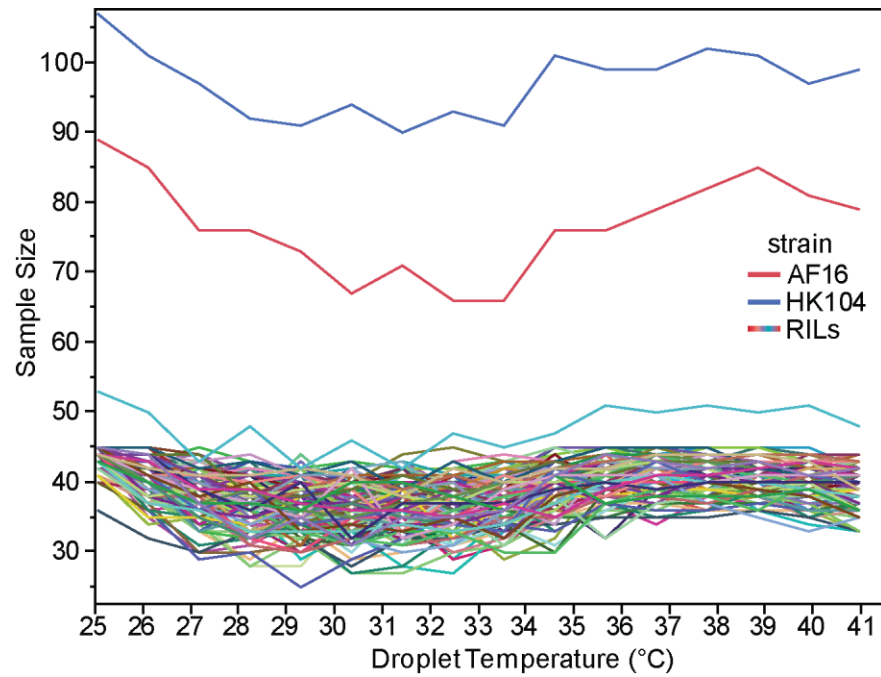

**Supplementary Figure S1.** Number of worms per strain passing quality filters at each temperature. All strains tested  $\geq 45$  individuals (except  $n=36$  for PB1209). A minimum of 25 individuals were included in all means for a given temperature.

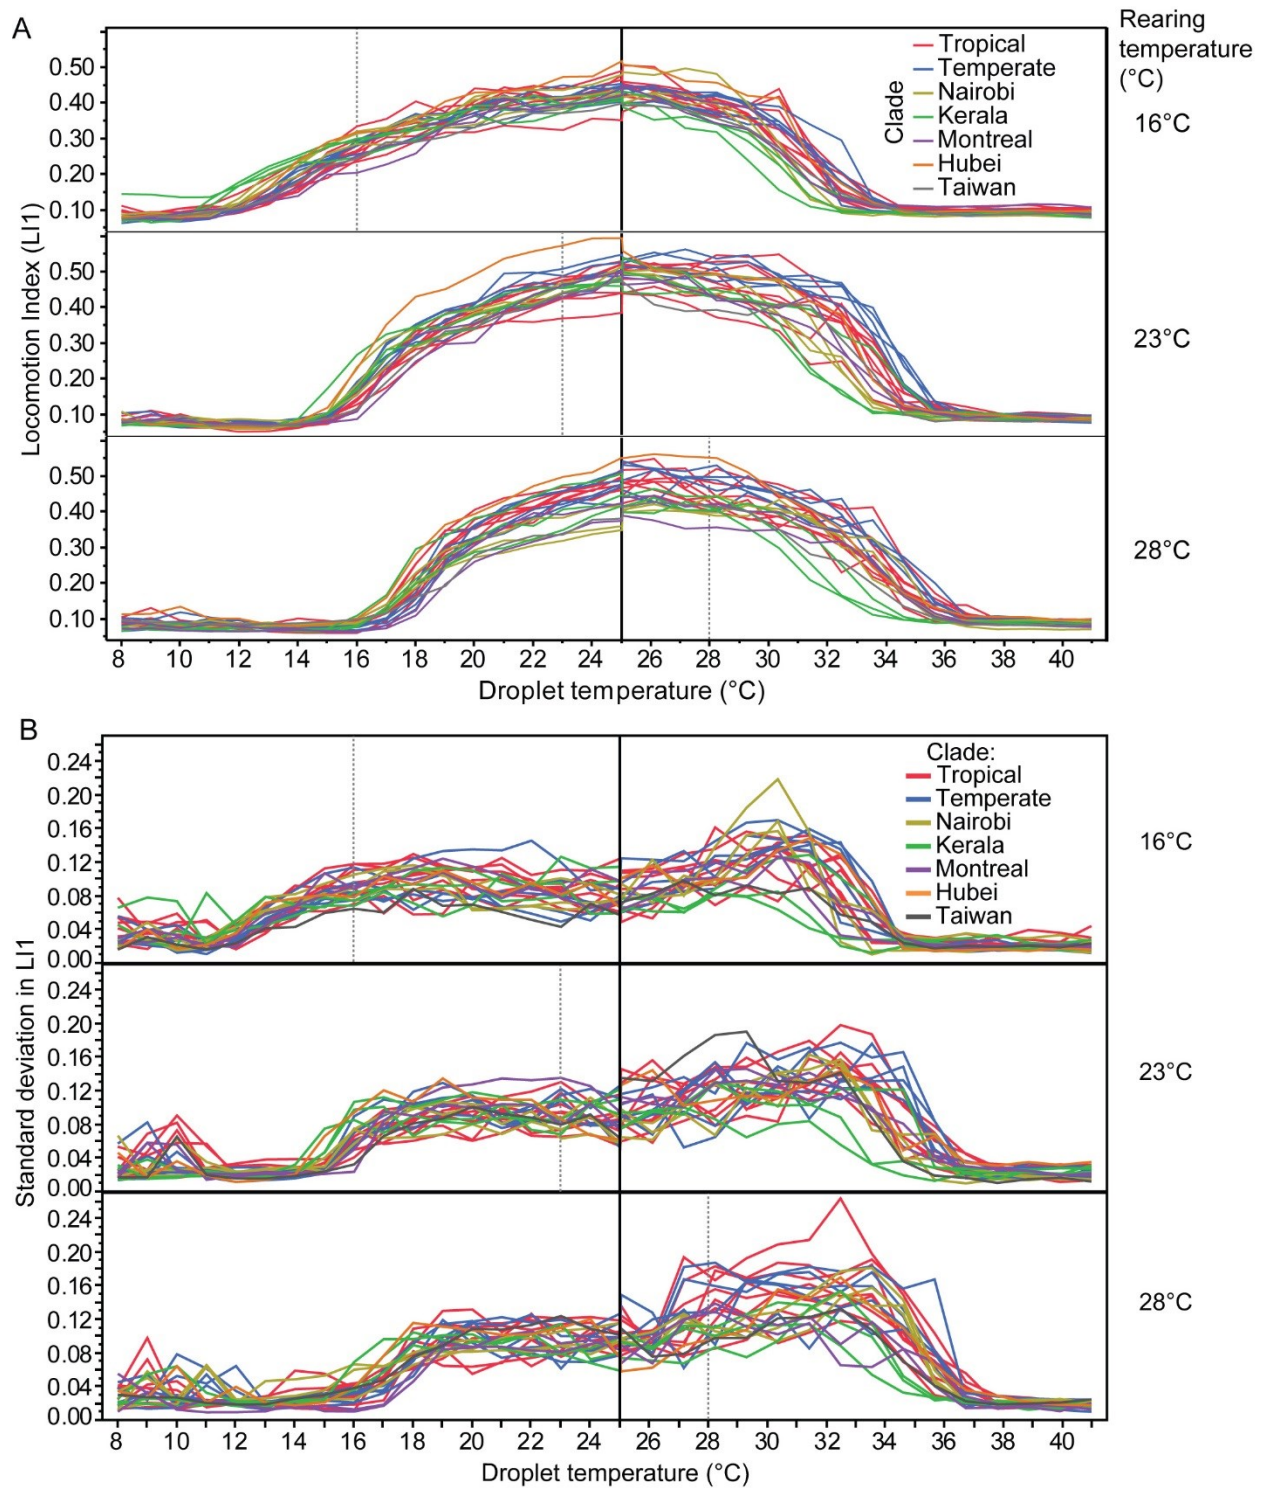

**Supplementary Figure S2.** Effect of rearing temperature on locomotory performance for each wild isolate strain of *C. briggsae*. **(A)** Thermal performance curves (TPCs) for mean LI1 locomotion index for each of 23 strains at three rearing temperatures (16°C, 23°C, 28°C; dashed vertical lines). **(B)** The standard deviation across individuals in LI1 for each strain. Elevated

values at temperatures below 12°C reflect condensation artifacts in the image analysis. Plots in A and B show results of two experiments, one decreasing and one increasing temperature from an initial assay temperature of 25°C (black vertical line). Strains are color coded according to phylogeographic group: red – Tropical (n=8 strains), blue – Temperate (n=5), yellow – Nairobi (n=3), green – Kerala (n=3), purple – Montreal (n=2), orange – Hubei (n=1), black – Taiwan (n=1).

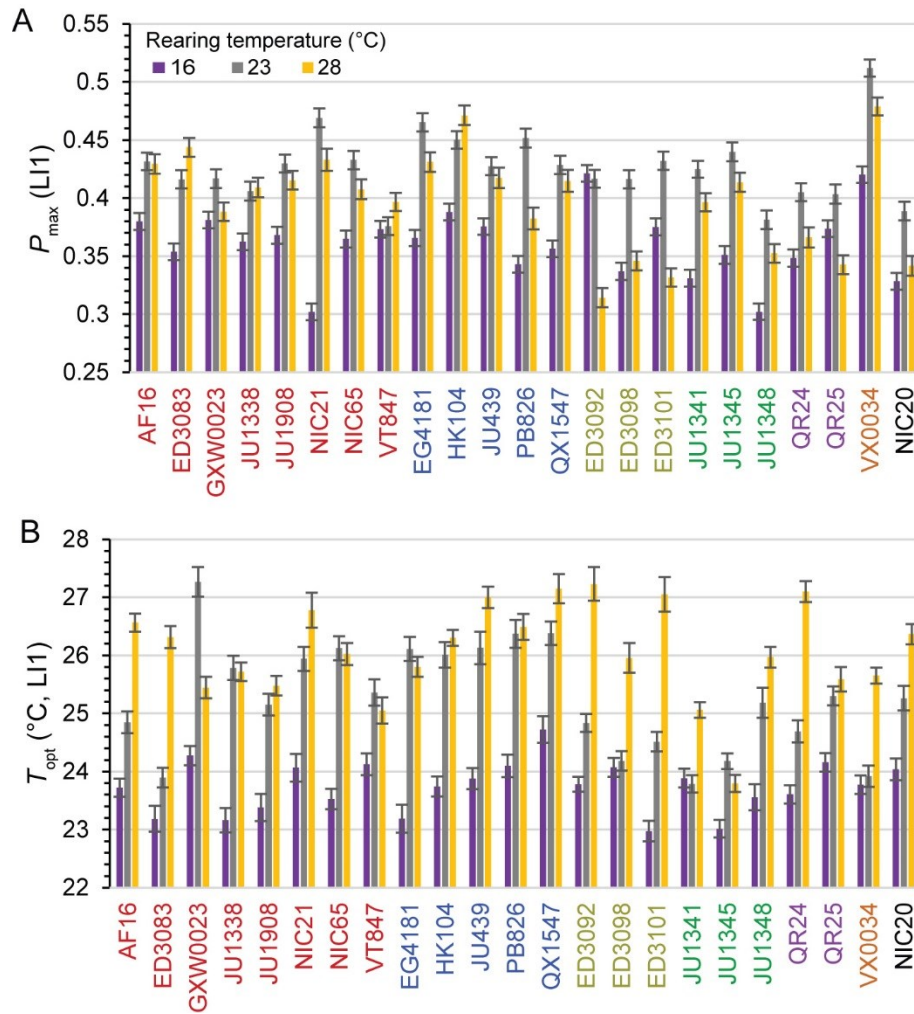

**Supplementary Figure S3.** Estimates of (A)  $P_{\max}$  and (B)  $T_{\text{opt}}$  for each wild isolate strain of *C. briggsae* when reared under three temperature conditions. Error bars indicate  $\pm 1$  standard error.



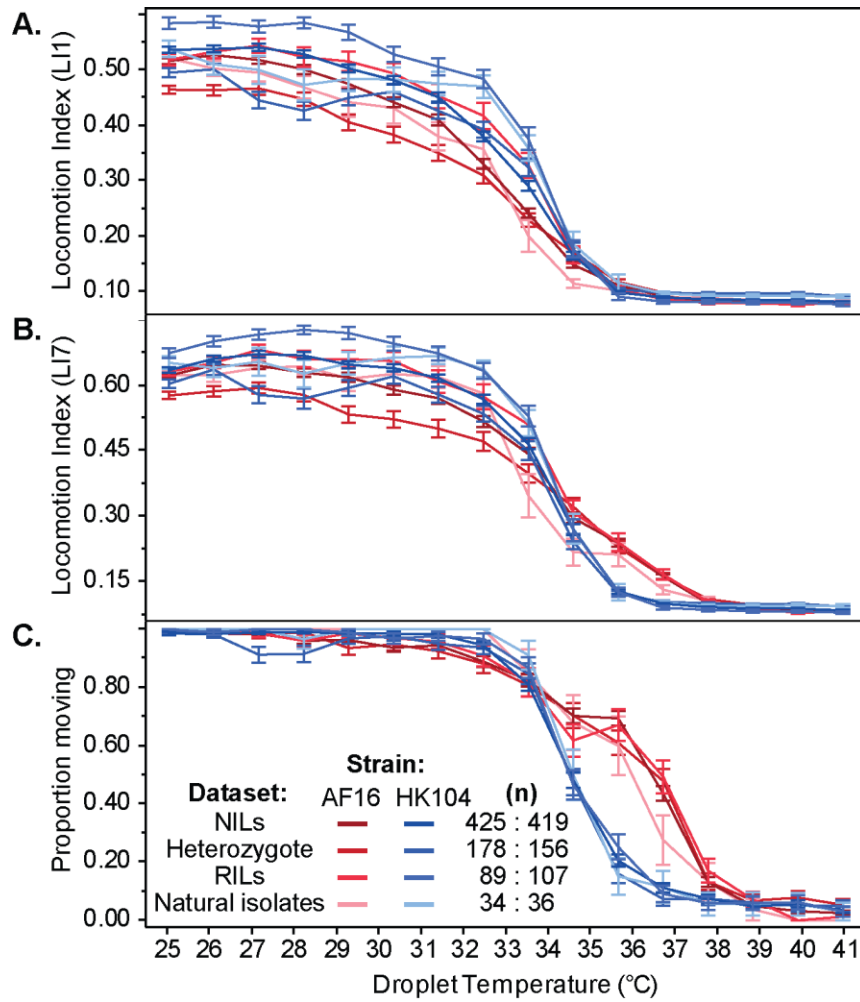

**Supplementary Figure S4.** Repeatability of multiple metrics of thermal performance for AF16 (red lines) and HK104 (blue lines) strains across four independent experiments: **(A)** LI1 locomotion index, **(B)** LI7 locomotion index, **(C)** proportion of animals moving. All animals reared at 23°C. Error bars indicate  $\pm 1$ SEM; darker lines indicate higher sample size for the corresponding experiment.

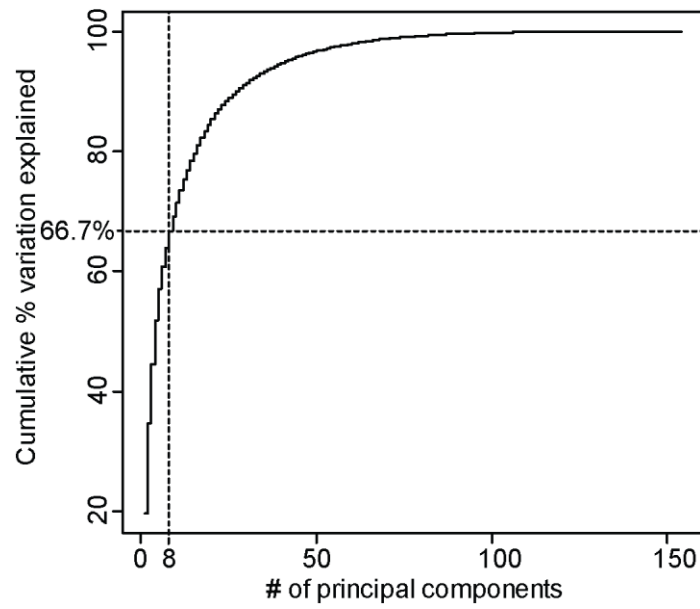

**Supplementary Figure S5.** Cumulative fraction of variation in 167 trait metrics explained by principal component axes. Horizontal and vertical dashed lines indicate the 8<sup>th</sup> principal component (PC8), which corresponds to ~66.7% of total variation explained by PC1 through PC8.

| A. | PC1                 | B.                    | PC2                   | C.                   | PC3                  | D.                   | PC4                   | E.                   | PC5                  | F.                   | PC6                  | G.                   | PC7                  | H.                   | PC8                  |
|----|---------------------|-----------------------|-----------------------|----------------------|----------------------|----------------------|-----------------------|----------------------|----------------------|----------------------|----------------------|----------------------|----------------------|----------------------|----------------------|
|    | <u>disp7_31</u>     | <u>LI_37</u>          | <u>LI_31</u>          | <u>std_disp7_32</u>  | <u>std_LI_26</u>     | <u>std_LI7_26</u>    | <u>SE_GrowthRate</u>  | <u>moving_39</u>     | <u>disp7_36</u>      | <u>std_LI7_25</u>    | <u>std_disp7_25</u>  | <u>std_disp7_39</u>  | <u>std_disp7_38</u>  | <u>std_disp7_39</u>  | <u>std_disp7_38</u>  |
|    | <u>disp32</u>       | <u>LI7_38</u>         | <u>LI7_38</u>         | <u>std_disp7_31</u>  | <u>std_LI7_27</u>    | <u>std_LI7_27</u>    | <u>GrowthRate</u>     | <u>disp7_36</u>      | <u>std_LI7_39</u>    | <u>std_LI7_26</u>    | <u>std_LI7_26</u>    | <u>std_disp7_39</u>  | <u>std_disp7_39</u>  | <u>std_disp7_39</u>  | <u>std_disp7_38</u>  |
|    | <u>LI_32</u>        | <u>disp36</u>         | <u>LI_32</u>          | <u>std_LI_32</u>     | <u>std_disp26</u>    | <u>std_disp26</u>    | <u>moving_32</u>      | <u>std_moving_34</u> | <u>std_LI7_39</u>    | <u>std_LI_26</u>     | <u>std_LI_26</u>     | <u>std_disp7_40</u>  | <u>std_disp7_40</u>  | <u>std_disp7_40</u>  | <u>std_disp7_40</u>  |
|    | <u>disp31</u>       | <u>SE_InflexionPt</u> | <u>SE_InflexionPt</u> | <u>std_disp32</u>    | <u>std_LI27</u>      | <u>std_LI27</u>      | <u>disp7_35</u>       | <u>std_moving_39</u> | <u>std_LI7_39</u>    | <u>std_LI_25</u>     | <u>std_LI_25</u>     | <u>LI_37</u>         | <u>LI_37</u>         | <u>LI_37</u>         | <u>LI_37</u>         |
|    | <u>disp7_32</u>     | <u>disp37</u>         | <u>disp37</u>         | <u>std_disp7_28</u>  | <u>moving_29</u>     | <u>moving_29</u>     | <u>SE Asymptote</u>   | <u>LI7_37</u>        | <u>LI7_37</u>        | <u>std_moving_26</u> | <u>std_moving_26</u> | <u>disp7_39</u>      | <u>disp7_39</u>      | <u>disp7_39</u>      | <u>disp7_39</u>      |
|    | <u>disp30</u>       | <u>LI_36</u>          | <u>LI_36</u>          | <u>std_disp29</u>    | <u>std_moving27</u>  | <u>std_moving27</u>  | <u>LI7_32</u>         | <u>std_LI7_40</u>    | <u>std_LI7_40</u>    | <u>std_LI7_25</u>    | <u>std_LI7_25</u>    | <u>std_disp7_37</u>  | <u>std_disp7_37</u>  | <u>std_disp7_37</u>  | <u>std_disp7_37</u>  |
|    | <u>disp33</u>       | <u>disp40</u>         | <u>disp40</u>         | <u>disp25</u>        | <u>LI7_40</u>        | <u>LI7_40</u>        | <u>LI7_35</u>         | <u>std_moving_40</u> | <u>std_moving_40</u> | <u>moving_26</u>     | <u>moving_26</u>     | <u>std_disp38</u>    | <u>std_disp38</u>    | <u>std_disp38</u>    | <u>std_disp38</u>    |
|    | <u>disp7_33</u>     | <u>disp39</u>         | <u>disp39</u>         | <u>disp26</u>        | <u>LI7_27</u>        | <u>LI7_27</u>        | <u>LI_32</u>          | <u>LI7_36</u>        | <u>LI7_36</u>        | <u>moving_29</u>     | <u>moving_29</u>     | <u>LI_38</u>         | <u>LI_38</u>         | <u>LI_38</u>         | <u>LI_38</u>         |
|    | <u>LI_30</u>        | <u>LI7_39</u>         | <u>LI7_39</u>         | <u>std_disp28</u>    | <u>InflexionPt</u>   | <u>InflexionPt</u>   | <u>std_LI_31</u>      | <u>disp7_37</u>      | <u>disp7_37</u>      | <u>moving_39</u>     | <u>moving_39</u>     | <u>LI_39</u>         | <u>LI_39</u>         | <u>LI_39</u>         | <u>LI_39</u>         |
|    | <u>LI_28</u>        | <u>LI7_37</u>         | <u>LI7_37</u>         | <u>std_LI_31</u>     | <u>LI7_26</u>        | <u>LI7_26</u>        | <u>LI7_40</u>         | <u>std_LI_39</u>     | <u>std_LI_39</u>     | <u>std_LI_37</u>     | <u>std_LI_37</u>     | <u>LI_36</u>         | <u>LI_36</u>         | <u>LI_36</u>         | <u>LI_36</u>         |
|    | <u>disp7_30</u>     | <u>LI_38</u>          | <u>disp38</u>         | <u>std_disp7_30</u>  | <u>moving_27</u>     | <u>moving_27</u>     | <u>moving_36</u>      | <u>moving_25</u>     | <u>moving_25</u>     | <u>std_moving_39</u> | <u>std_moving_39</u> | <u>LI_40</u>         | <u>LI_40</u>         | <u>LI_40</u>         | <u>LI_40</u>         |
|    | <u>LI_33</u>        | <u>disp38</u>         | <u>disp38</u>         | <u>std_disp7_29</u>  | <u>disp7_40</u>      | <u>disp7_40</u>      | <u>moving_31</u>      | <u>std_moving_25</u> | <u>std_moving_25</u> | <u>std_LI_38</u>     | <u>std_LI_38</u>     | <u>LI7_37</u>        | <u>LI7_37</u>        | <u>LI7_37</u>        | <u>LI7_37</u>        |
|    | <u>LI_29</u>        | <u>std_moving_37</u>  | <u>std_moving_37</u>  | <u>std_LI7_32</u>    | <u>std_disp7_26</u>  | <u>std_disp7_26</u>  | <u>LI_35</u>          | <u>LI_36</u>         | <u>LI_36</u>         | <u>std_LI_36</u>     | <u>std_LI_36</u>     | <u>std_disp25</u>    | <u>std_disp25</u>    | <u>std_disp25</u>    | <u>std_disp25</u>    |
|    | <u>disp28</u>       | <u>LI7_40</u>         | <u>LI7_40</u>         | <u>std_disp30</u>    | <u>std_LI7_25</u>    | <u>std_LI7_25</u>    | <u>LI_40</u>          | <u>std_moving_33</u> | <u>std_moving_33</u> | <u>std_moving_29</u> | <u>std_moving_29</u> | <u>std_disp40</u>    | <u>std_disp40</u>    | <u>std_disp40</u>    | <u>std_disp40</u>    |
|    | <u>disp7_29</u>     | <u>LI_39</u>          | <u>LI_39</u>          | <u>disp27</u>        | <u>std_LI_25</u>     | <u>std_LI_25</u>     | <u>std_LI7_31</u>     | <u>moving_40</u>     | <u>moving_40</u>     | <u>std_LI_39</u>     | <u>std_LI_39</u>     | <u>LI7_38</u>        | <u>LI7_38</u>        | <u>LI7_38</u>        | <u>LI7_38</u>        |
|    | <u>disp7_28</u>     | <u>disp7_39</u>       | <u>disp7_39</u>       | <u>InflexionPt</u>   | <u>disp7_38</u>      | <u>disp7_38</u>      | <u>disp7_32</u>       | <u>SE_GrowthRate</u> | <u>SE_GrowthRate</u> | <u>std_moving_25</u> | <u>std_moving_25</u> | <u>std_LI7_25</u>    | <u>std_LI7_25</u>    | <u>std_LI7_25</u>    | <u>std_LI7_25</u>    |
|    | <u>disp29</u>       | <u>LI_40</u>          | <u>LI_40</u>          | <u>std_LI_29</u>     | <u>LI7_38</u>        | <u>LI7_38</u>        | <u>SE_InflexionPt</u> | <u>std_LI_40</u>     | <u>std_LI_40</u>     | <u>std_LI7_39</u>    | <u>std_LI7_39</u>    | <u>disp7_40</u>      | <u>disp7_40</u>      | <u>disp7_40</u>      | <u>disp7_40</u>      |
|    | <u>LI_27</u>        | <u>std_LI_37</u>      | <u>std_LI_37</u>      | <u>LI7_35</u>        | <u>std_LI7_29</u>    | <u>std_LI7_29</u>    | <u>LI7_39</u>         | <u>std_disp7_36</u>  | <u>std_disp7_36</u>  | <u>moving_28</u>     | <u>moving_28</u>     | <u>disp7_38</u>      | <u>disp7_38</u>      | <u>disp7_38</u>      | <u>disp7_38</u>      |
|    | <u>LI_26</u>        | <u>disp7_38</u>       | <u>disp7_38</u>       | <u>std_LI_28</u>     | <u>moving_28</u>     | <u>moving_28</u>     | <u>LI_39</u>          | <u>std_LI_25</u>     | <u>std_LI_25</u>     | <u>std_disp29</u>    | <u>std_disp29</u>    | <u>LI7_39</u>        | <u>LI7_39</u>        | <u>LI7_39</u>        | <u>LI7_39</u>        |
|    | <u>std_disp7_34</u> | <u>disp7_36</u>       | <u>disp7_36</u>       | <u>std_LI_30</u>     | <u>moving_26</u>     | <u>moving_26</u>     | <u>disp32</u>         | <u>disp36</u>        | <u>disp36</u>        | <u>std_moving_28</u> | <u>std_moving_28</u> | <u>std_disp7_36</u>  | <u>std_disp7_36</u>  | <u>std_disp7_36</u>  | <u>std_disp7_36</u>  |
|    | <u>disp7_26</u>     | <u>std_LI_40</u>      | <u>std_LI_40</u>      | <u>std_moving_32</u> | <u>LI7_39</u>        | <u>LI7_39</u>        | <u>std_disp7_31</u>   | <u>std_disp32</u>    | <u>std_disp32</u>    | <u>moving_25</u>     | <u>moving_25</u>     | <u>std_LI_25</u>     | <u>std_LI_25</u>     | <u>std_LI_25</u>     | <u>std_LI_25</u>     |
|    | <u>LI_34</u>        | <u>disp35</u>         | <u>disp35</u>         | <u>std_disp27</u>    | <u>disp40</u>        | <u>disp40</u>        | <u>std_LI7_36</u>     | <u>std_LI7_30</u>    | <u>std_LI7_30</u>    | <u>std_disp26</u>    | <u>std_disp26</u>    | <u>std_moving_29</u> | <u>std_moving_29</u> | <u>std_moving_29</u> | <u>std_moving_29</u> |
|    | <u>std_LI_34</u>    | <u>moving_37</u>      | <u>moving_37</u>      | <u>std_LI7_31</u>    | <u>std_disp7_29</u>  | <u>std_disp7_29</u>  | <u>moving_37</u>      | <u>std_LI7_33</u>    | <u>std_LI7_33</u>    | <u>std_LI7_28</u>    | <u>std_LI7_28</u>    | <u>LI7_40</u>        | <u>LI7_40</u>        | <u>LI7_40</u>        | <u>LI7_40</u>        |
|    | <u>disp7_34</u>     | <u>std_LI_38</u>      | <u>std_LI_38</u>      | <u>disp7_35</u>      | <u>LI_40</u>         | <u>LI_40</u>         | <u>LI_38</u>          | <u>moving_33</u>     | <u>moving_33</u>     | <u>std_LI_40</u>     | <u>std_LI_40</u>     | <u>std_disp37</u>    | <u>std_disp37</u>    | <u>std_disp37</u>    | <u>std_disp37</u>    |
|    | <u>LI7_33</u>       | <u>std_LI7_39</u>     | <u>std_LI7_39</u>     | <u>std_LI7_29</u>    | <u>std_moving_26</u> | <u>std_moving_26</u> | <u>moving_35</u>      | <u>std_LI7_34</u>    | <u>std_LI7_34</u>    | <u>std_LI_28</u>     | <u>std_LI_28</u>     | <u>disp39</u>        | <u>disp39</u>        | <u>disp39</u>        | <u>disp39</u>        |
|    | <u>disp34</u>       | <u>disp7_40</u>       | <u>disp7_40</u>       | <u>LI7_34</u>        | <u>std_LI7_40</u>    | <u>std_LI7_40</u>    | <u>std_LI7_32</u>     | <u>std_LI_38</u>     | <u>std_LI_38</u>     | <u>std_LI_29</u>     | <u>std_LI_29</u>     | <u>std_LI_38</u>     | <u>std_LI_38</u>     | <u>std_LI_38</u>     | <u>std_LI_38</u>     |
|    | <u>disp7_25</u>     | <u>std_LI7_30</u>     | <u>std_LI7_30</u>     | <u>moving_34</u>     | <u>std_LI_29</u>     | <u>std_LI_29</u>     | <u>std_LI_25</u>      | <u>disp38</u>        | <u>disp38</u>        | <u>std_LI7_38</u>    | <u>std_LI7_38</u>    | <u>moving_37</u>     | <u>moving_37</u>     | <u>moving_37</u>     | <u>moving_37</u>     |
|    | <u>LI_25</u>        | <u>std_LI7_38</u>     | <u>std_LI7_38</u>     | <u>disp7_25</u>      | <u>std_moving_29</u> | <u>std_moving_29</u> | <u>std_moving32</u>   | <u>moving_38</u>     | <u>moving_38</u>     | <u>std_LI7_33</u>    | <u>std_LI7_33</u>    | <u>moving_29</u>     | <u>moving_29</u>     | <u>moving_29</u>     | <u>moving_29</u>     |
|    | <u>disp7_27</u>     | <u>std_LI7_40</u>     | <u>std_LI7_40</u>     | <u>std_disp7_27</u>  | <u>LI7_29</u>        | <u>LI7_29</u>        | <u>std_disp7_35</u>   | <u>std_LI_34</u>     | <u>std_LI_34</u>     | <u>std_disp25</u>    | <u>std_disp25</u>    | <u>moving_31</u>     | <u>moving_31</u>     | <u>moving_31</u>     | <u>moving_31</u>     |

|               |                        |
|---------------|------------------------|
| <u>LI7</u>    | Locomotion index (LI7) |
| <u>LI</u>     | Locomotion index (LI1) |
| <u>disp</u>   | Displacement           |
| <u>disp7</u>  | Displacement (7 frame) |
| <u>moving</u> | Proportion Moving      |

|                   |                          |
|-------------------|--------------------------|
| <b>bold</b>       | proportion moving        |
| <i>italicized</i> | Locomotion Index         |
| <u>underlined</u> | measured one frame apart |

|             |                                    |
|-------------|------------------------------------|
| Slope       | Slope parameter estimate           |
| InflexionPt | Inflexion Point parameter estimate |
| Asymptote   | Asymptote parameter estimate       |
| std         | White text is Standard deviation   |
| SE          | or white text is Standard error    |

|                               |   |    |    |    |    |    |    |    |    |    |     |
|-------------------------------|---|----|----|----|----|----|----|----|----|----|-----|
| Absolute value of weight      | 0 | 10 | 20 | 30 | 40 | 50 | 60 | 70 | 80 | 90 | 100 |
| Percentage of range in values |   |    |    |    |    |    |    |    |    |    |     |
| Negative weights in magenta   |   |    |    |    |    |    |    |    |    |    |     |

Phenotype Temperature (°C)

|       |       |       |       |       |       |       |       |       |       |       |       |       |       |       |       |
|-------|-------|-------|-------|-------|-------|-------|-------|-------|-------|-------|-------|-------|-------|-------|-------|
| 25.03 | 26.10 | 27.16 | 28.22 | 29.28 | 30.34 | 31.40 | 32.46 | 33.52 | 34.59 | 35.65 | 36.71 | 37.77 | 38.83 | 39.89 | 40.95 |
|-------|-------|-------|-------|-------|-------|-------|-------|-------|-------|-------|-------|-------|-------|-------|-------|

**Supplementary Figure S6.** Diagrammatic representations of phenotype weights of principal component axes PC1 to PC8 (**A-H**). Each pair of columns lists the top 30 phenotypes that contribute to a principal component axis and their absolute value weights. Short-form phenotype names explained in legend. The colour of the first column is graded according the temperature of the phenotypes (blue 25°C to red 41°C); function fit parameter phenotypes are coloured cyan, magenta or yellow; font style differences correspond to phenotype categories (see legend). White text in trait column indicates a “variation” phenotype (standard deviation for locomotion metrics, or standard error for function fit parameters); magenta text in weight column indicates a negative weight (see legend).

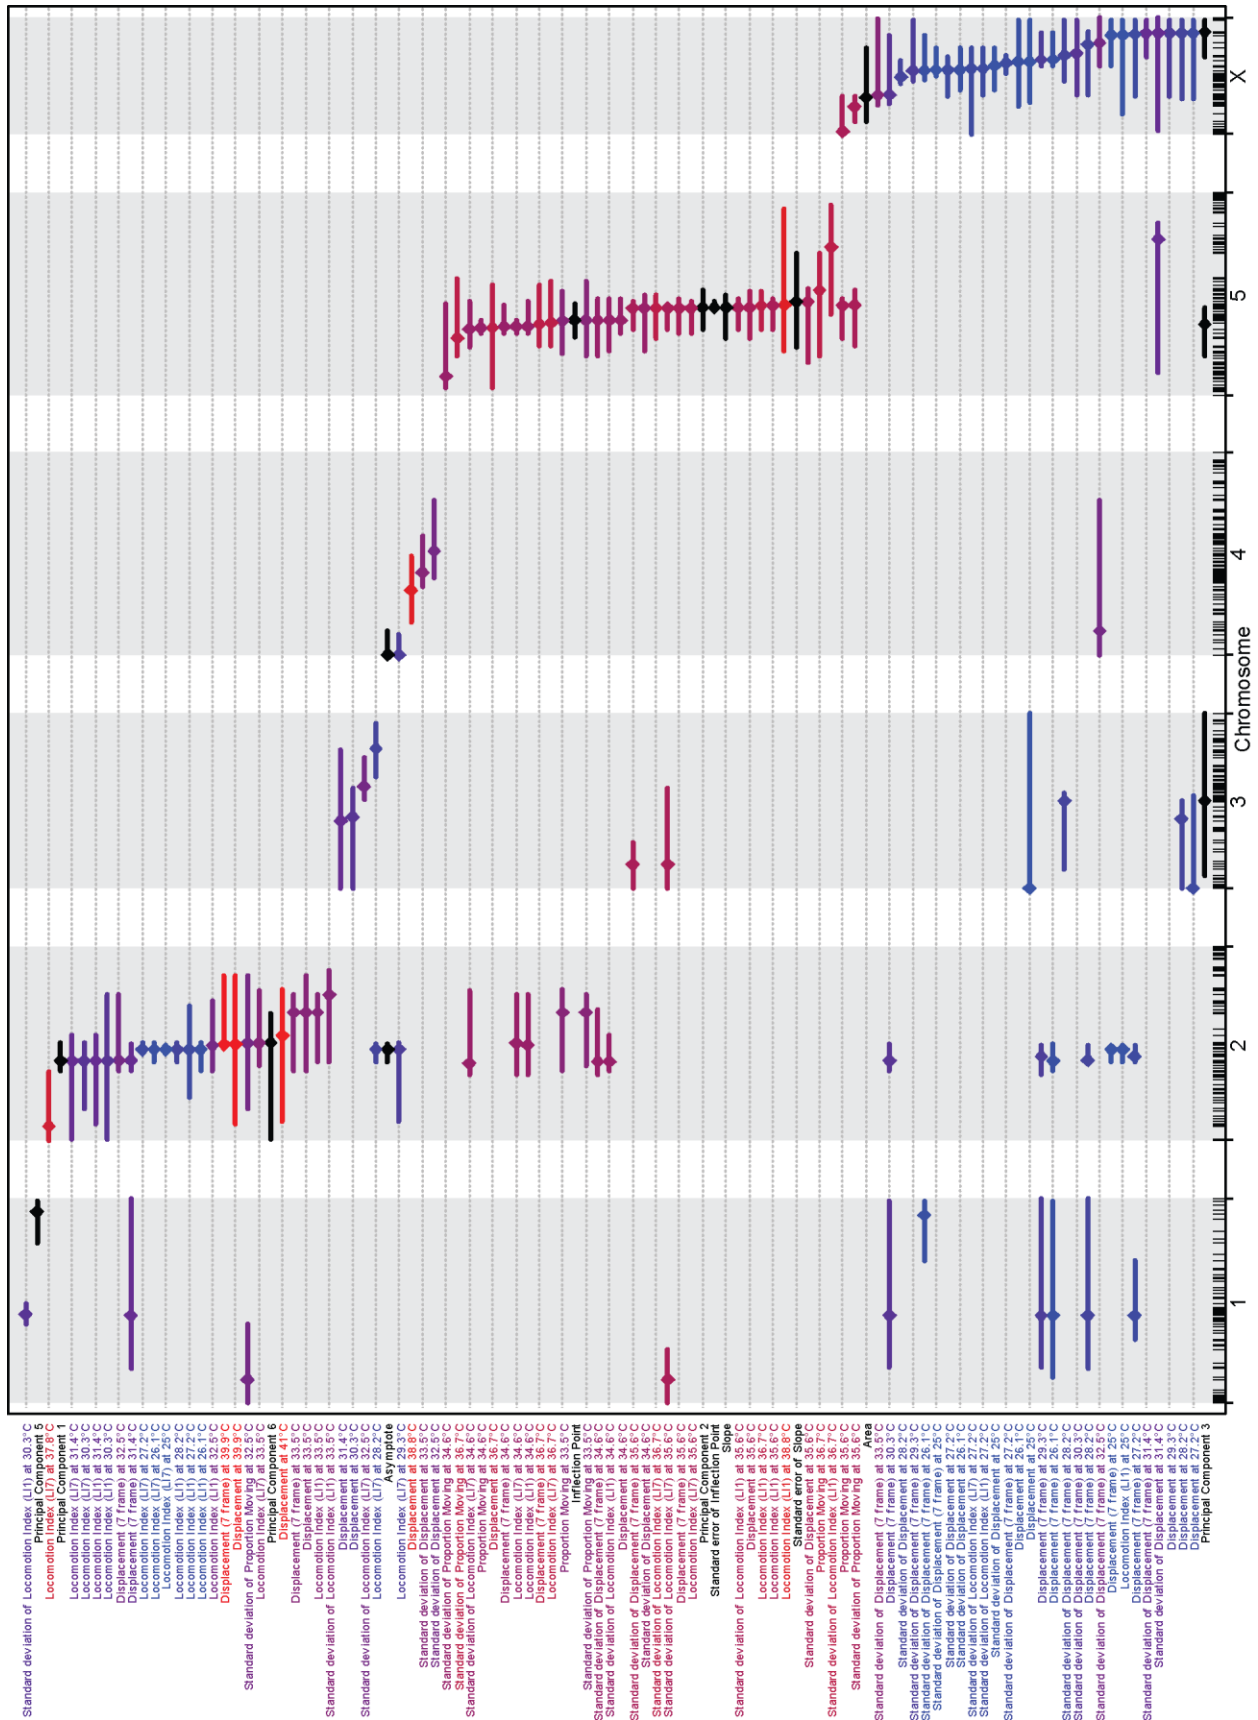

**Supplementary Figure S7.** Exploratory QTL mapping across all chromosomes for univariate trait metrics, function-valued trait phenotypes, and synthetic PC phenotypes. QTL LOD peak location and 95% Bayes intervals shown for 102 of 175 traits for each chromosome for all phenotypes that showed LOD scores above significance threshold derived from 2500 permutations of the data ( $P=0.05$ , not corrected for multiple testing). The intervals are mapped to the nearest genotyped marker (tick marks along the chromosome axis). Intervals and univariate phenotype labels are colour-coded according to temperature (blue for cooler temperatures, red for hotter temperatures).

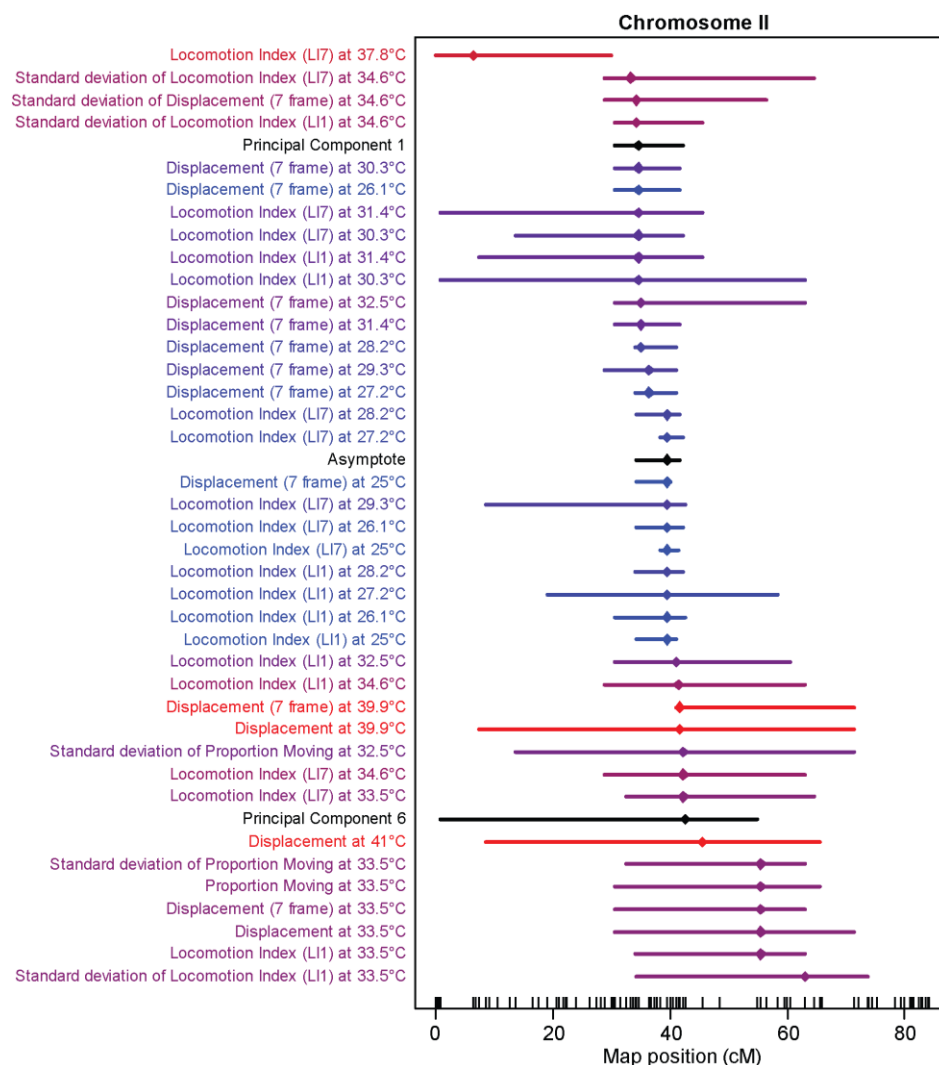

**Supplementary Figure S8.** QTL LOD peak location and 95% Bayes credible interval width for phenotypes with significant QTL on Chromosome II (from Supplementary Figure S7).

Significance threshold determined by 2500 permutations of the data ( $P=0.05$  per trait, not corrected for multiple tests). Intervals and phenotype labels are colour-coded according to temperature when relevant (blue is cooler and red is hotter). Some phenotypes also had peaks on other chromosomes (see Supplementary Figure S7).

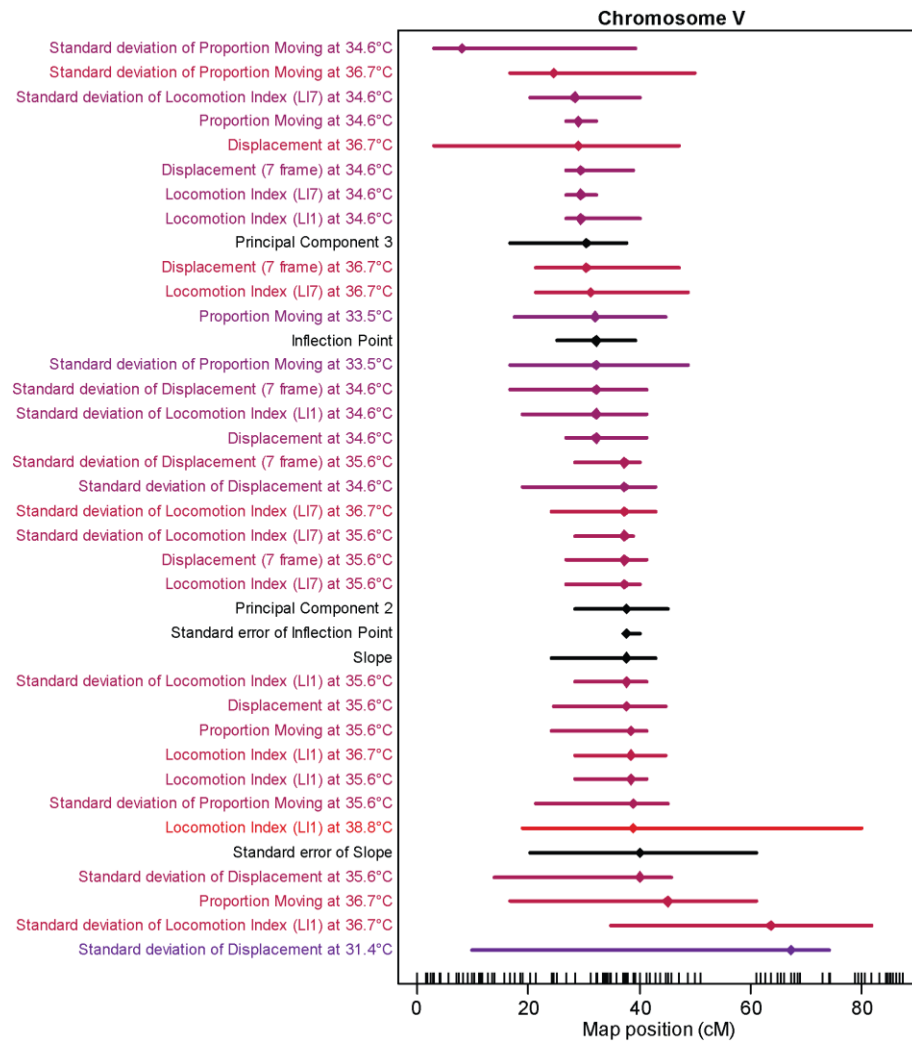

**Supplementary Figure S9.** QTL LOD peak location and 95% Bayes credible interval width for phenotypes with significant QTL on Chromosome V (from Supplementary Figure S7). Significance threshold determined by 2500 permutations of the data ( $P=0.05$  per trait, not corrected for multiple tests). Intervals and phenotype labels are colour-coded according to temperature when relevant (blue is cooler and red is hotter). Some phenotypes also had peaks on other chromosomes (see Supplementary Figure S7).



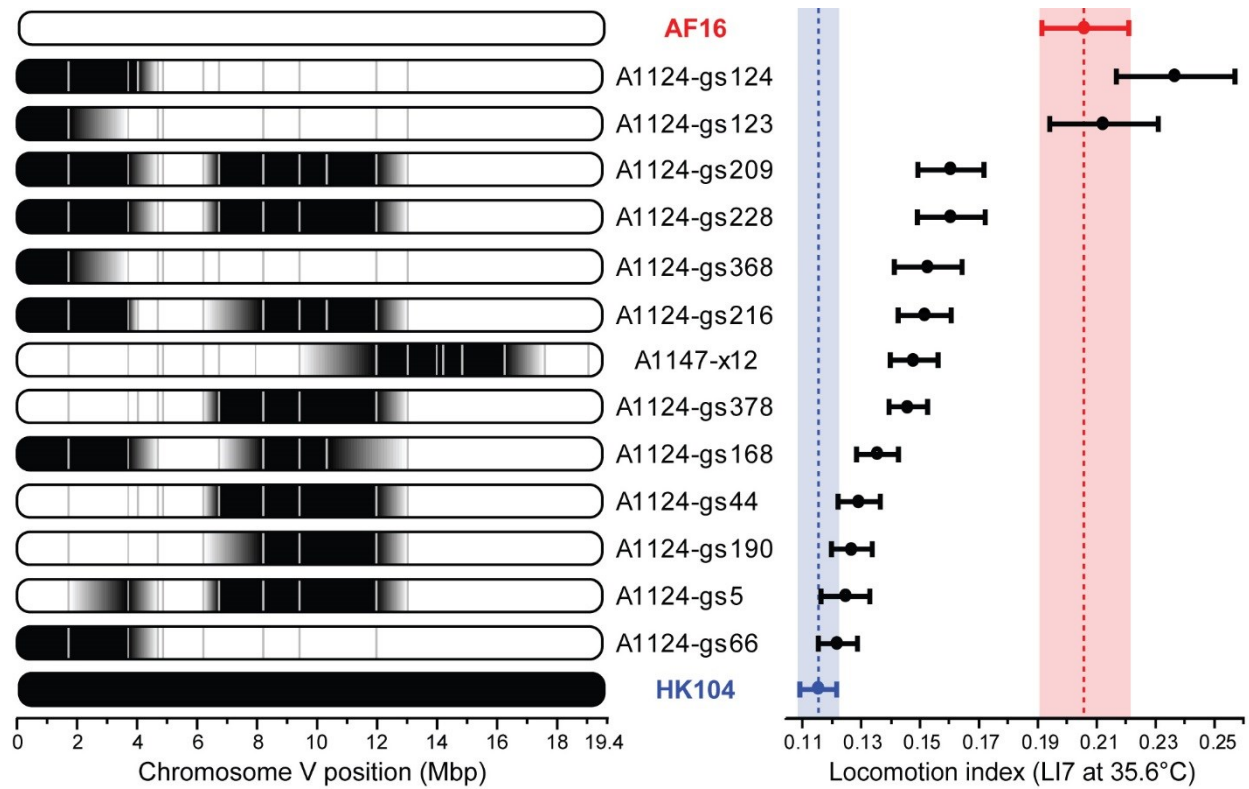

**Supplementary Figure S10.** Schematic representation of parental strain and near isogenic line (NIL) genotypes for Chromosome V and their corresponding locomotion index (LI7) phenotypes at 35.6°C. Vertical gray lines in on chromosome diagram indicate positions of genotyped markers, with white fill indicating Tropical AF16 sequence and black indicating Temperate HK104 sequence. Gradients indicate region of uncertain breakpoint position between genotyped markers. Error bars indicate  $\pm 1$  SEM.



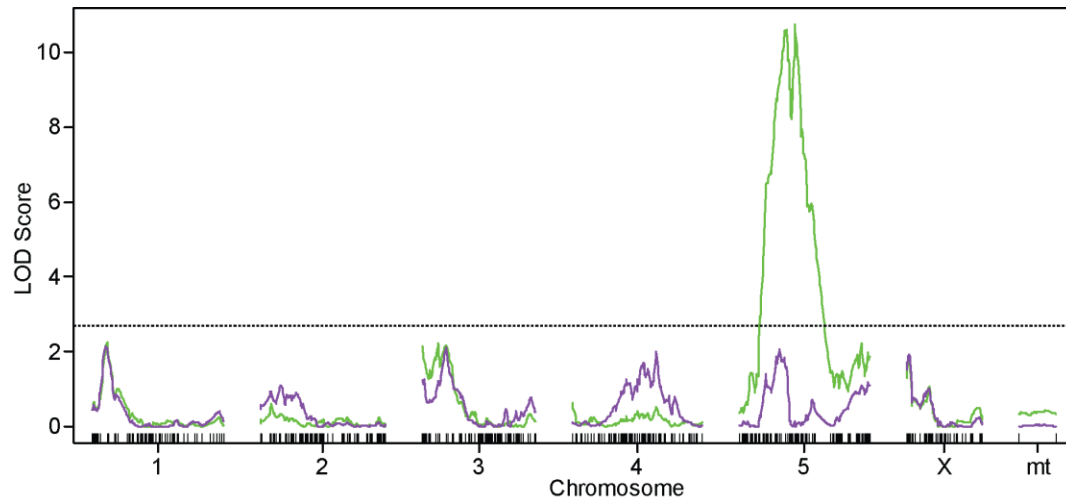

**Supplementary Figure S12.** Co-factor analysis of Locomotion Index (LI7) at 35.6°C QTL “twin” peak markers finds no statistical support for two separate QTL peaks. LOD values for Locomotion Index (LI7) at 35.6°C phenotype (green) shows significant QTL on Chromosome V, with two nominal LOD score peaks. LOD scores for the same phenotype that includes genotypes at marker cb3903 (37.4cM, right green “peak”) as additive covariates (purple) show no QTL (BROMAN AND SEN 2009), indicating that the left “peak” is not statistically separable from the right “peak.” Horizontal line indicates the LOD significance threshold from 1000 permutations of the data with the covariate included. We next evaluated a model with the two independent, non-interacting QTLs at the “split” LOD peaks for the LI7 at 35.6°C phenotype from the multiple imputation analysis (positions 37.35cM and 31.5cM on Chromosome V). This model explained 30.8% of the variation in locomotion (LI7) at 35.6°C, with LOD = 12.2 as the likelihood ratio of this full model to the null model of no QTL ( $P=1.05 \times 10^{-12}$ ), and each QTL was significant when dropped from the model one at a time. We then tested for a second additive QTL when starting with a model that contained a QTL at 37.4cM on Chromosome V (using `addqtl()` from `r/qtl` (BROMAN AND SEN 2009) for LI7 at 35.6°C), but this analysis just added a QTL on Chromosome III at 16cM with a rather low LOD score of 2.1. When we instead fix the alternate Chromosome V locus at 30.5cM, the analysis does add another QTL on Chromosome V, but at the tip (49.0cM) and with a low LOD = 2.0 (combined two-locus LOD = 12.9, 32.2% of variation explained). Despite this meagre support for a second additive QTL on Chromosome V, the positions are inconsistent with the hypothesis of twin QTL peaks in the center of the chromosome.
